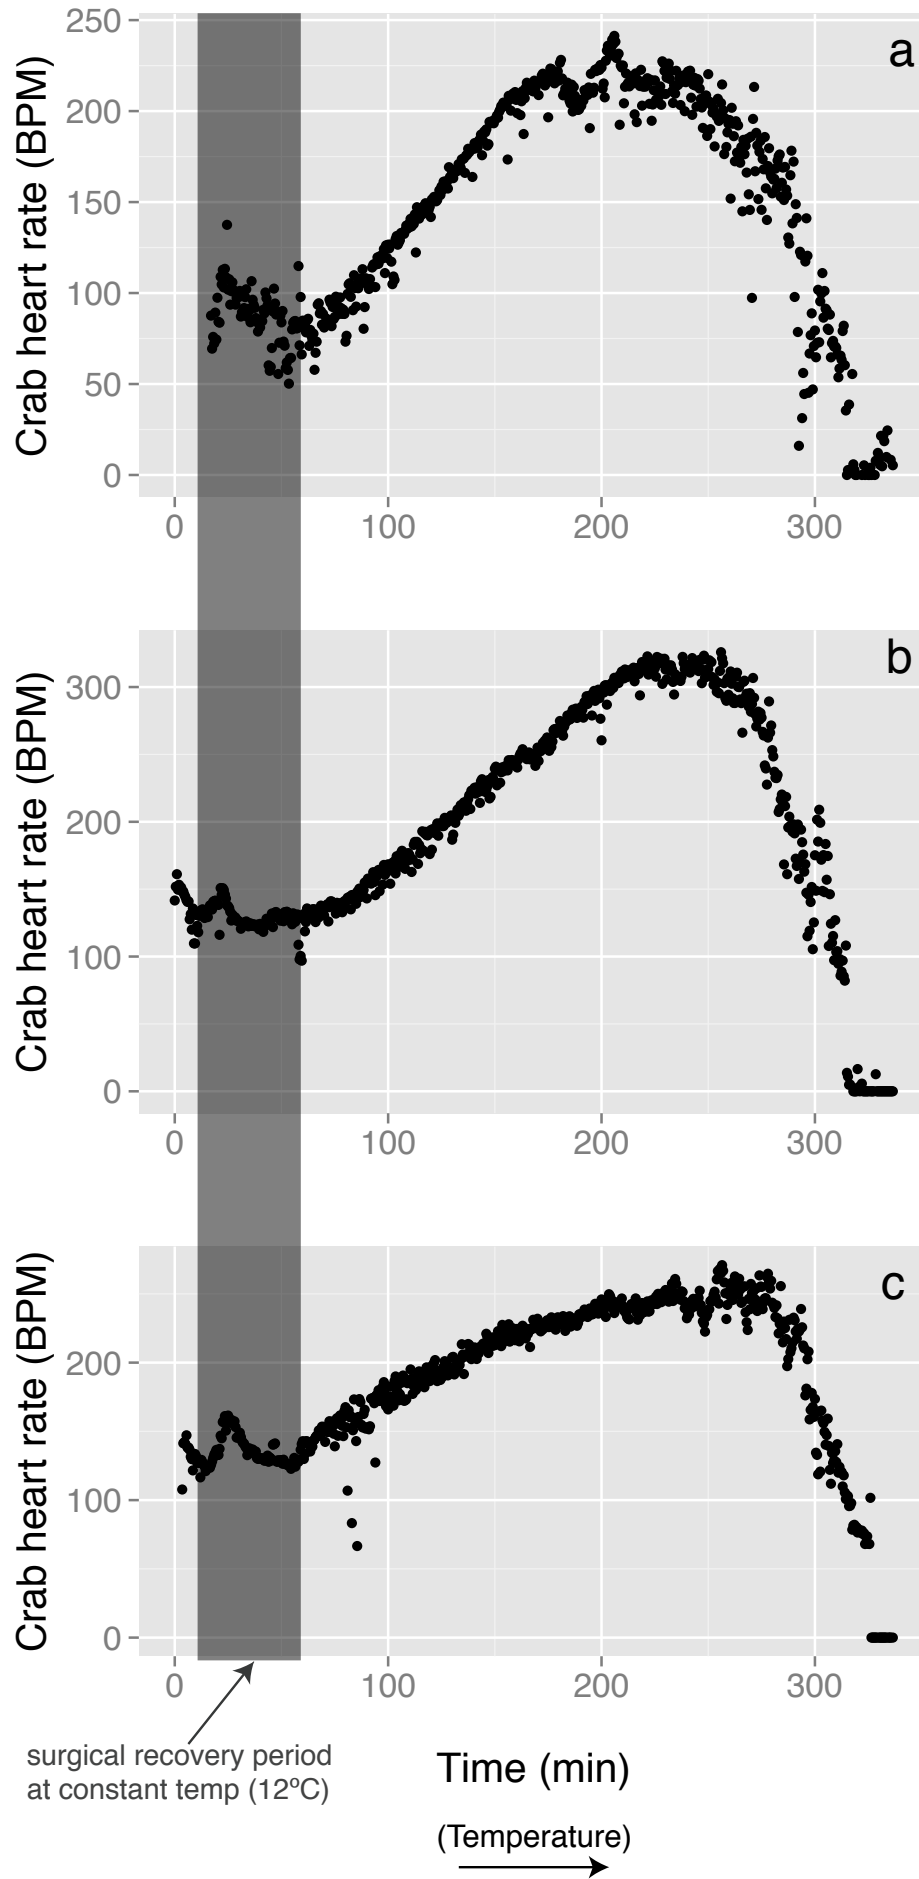

Source: https://cob.silverchair-cdn.com/cob/content_public/journal/jeb/217/22/10.1242_jeb.109801/6/jeb109801.pdf
